# Supplementary material for: A single active ring model with velocity self-alignment
Source: Royal Society of Chemistry journal article supplement (doi:10.1039/d1sm00080b), 2021-01-01
Supplement: d1sm00080b6.pdf [file d1sm00080b6.pdf]

# Single Active Ring Model - Supplementary Material

Emanuel F. Teixeira, Heitor C. M. Fernandes and Leonardo G. Brunnet

February 13, 2021

## 1 Mean Squared Displacement for an Active Brownian Particle (ABP)

In two dimensions, a single active particle trajectory at time  $t$  is described by its position  $\vec{r}(t) = (x(t), y(t))$  and self-propelled velocity  $v_0 \hat{n}(t) = v_0 (\cos \theta(t), \sin \theta(t))$ , where  $\theta(t)$  is the self-propelled velocity angle with the x-axis and  $v_0$  is the self-propelled speed. We describe the dynamics of an isolated active Brownian by a set of overdamped Langevin equations<sup>1-3</sup>

$$\dot{\vec{r}}(t) = v_0 \hat{n}(t) + \sqrt{2D_T} \vec{\chi}(t), \quad (1)$$

$$\dot{\theta}(t) = \sqrt{2D_R} \xi(t), \quad (2)$$

where the dot above the dynamic variables denotes temporal derivative and  $D_T$ ,  $D_R$  are the thermal and rotational diffusion constants, respectively. The terms  $\xi(t)$  and  $\vec{\chi}(t)$  are white Gaussian noises with zero-mean, second moment  $\langle \xi(t_1) \xi(t_2) \rangle = \delta(t_1 - t_2)$  and  $\langle \vec{\chi}(t_1) \cdot \vec{\chi}(t_2) \rangle = 2\delta(t_1 - t_2)$ . Setting the initial time  $t_0 = 0$ , we integrate the Langevin equations Eqs. (1), (2),

$$\vec{r}(t) = \vec{r}_0 + v_0 \int_0^t \hat{n}(t) dt + \sqrt{2D_T} \int_0^t \vec{\chi}(t) dt, \quad (3)$$

$$\theta(t) = \theta_0 + \sqrt{2D_R} \int_0^t \xi(t) dt \quad (4)$$

we recognize a Wiener process in the second term of Eq. (4). The average over different realizations in Eqs. (3), (4) results in,

$$\langle \vec{r}(t) \rangle = \vec{r}_0 + v_0 \int_0^t \langle \hat{n}(t) \rangle dt, \quad (5)$$

$$\langle \theta(t) \rangle = \theta_0. \quad (6)$$

The computation of second moments involves noise correlations,

$$\begin{aligned} \langle \vec{r}(t)^2 \rangle &= r_0^2 + 2v_0 \vec{r}_0 \cdot \int_0^t \langle \hat{n}(t) \rangle dt \\ &+ v_0^2 \int_0^t \int_0^t \langle \hat{n}(t_1) \cdot \hat{n}(t_2) \rangle dt_1 dt_2 \\ &+ 2D_T \int_0^t \int_0^t \langle \vec{\chi}(t_1) \cdot \vec{\chi}(t_2) \rangle dt_1 dt_2, \end{aligned} \quad (7)$$

$$\langle \theta(t)^2 \rangle = \theta_0^2 + 2D_R \int_0^t \int_0^t \langle \xi(t_1) \xi(t_2) \rangle dt_1 dt_2, \quad (8)$$

where we used  $\langle \hat{n}(t) \cdot \vec{\chi}(t) \rangle = \langle \hat{n}(t) \rangle \cdot \langle \vec{\chi}(t) \rangle$  and  $\langle \vec{r}_0 \cdot \vec{\chi}(t) \rangle = \vec{r}_0 \cdot \langle \vec{\chi}(t) \rangle$ , thus

$$\sigma^2 = \langle \theta(t)^2 \rangle - \langle \theta(t) \rangle^2 = 2D_R t. \quad (9)$$

The mean-square displacement  $msd(t) = \langle (\vec{r}(t) - \vec{r}_0)^2 \rangle$  is defined by

$$\langle (\vec{r}(t) - \vec{r}_0)^2 \rangle = \langle \vec{r}(t)^2 \rangle + r_0^2 - 2\vec{r}_0 \cdot \langle \vec{r}(t) \rangle, \quad (10)$$

$$\begin{aligned} \langle (\vec{r}(t) - \vec{r}_0)^2 \rangle &= v_0^2 \int_0^t \int_0^t \langle \hat{n}(t_1) \cdot \hat{n}(t_2) \rangle dt_1 dt_2 \\ &+ 2D_T \int_0^t \int_0^t \langle \vec{\chi}(t_1) \cdot \vec{\chi}(t_2) \rangle dt_1 dt_2, \end{aligned} \quad (11)$$

$$\begin{aligned} \langle (\vec{r}(t) - \vec{r}_0)^2 \rangle &= v_0^2 \int_0^t \int_0^t \langle \hat{n}(t_1) \cdot \hat{n}(t_2) \rangle dt_1 dt_2 \\ &+ 4D_T t, \end{aligned}$$

where the term  $v_0^2 \langle \hat{n}(t_1) \cdot \hat{n}(t_2) \rangle$  is called of self-propelled velocity autocorrelation function. Since the angle  $\theta(t)$  is a Wiener process, its distribution is a Gaussian with mean  $\theta_0$  and variance  $\sigma^2 = 2D_R t$ , thus

$$\rho(\theta(t)) = \frac{1}{\sqrt{2\pi\sigma^2}} \exp\left(-\frac{(\theta(t) - \theta_0)^2}{2\sigma^2}\right). \quad (12)$$

The mean value of self-propelled velocity direction  $\langle \hat{n}(t) \rangle$  may be calculate using the angular distribution,

$$\begin{aligned} \langle \hat{n}(t) \rangle &= \int_{-\infty}^{\infty} \rho(\theta(t)) (\cos \theta(t) \hat{i} + \sin \theta(t) \hat{j}) d\theta, \\ &= \hat{i} \int_{-\infty}^{\infty} \cos \theta(t) \rho(\theta(t)) d\theta, \end{aligned} \quad (13)$$

the integral in the second term of Eq. (13) is zero since the sine function is odd and the Gaussian distribution even. We can rewrite the Eq (14) as

$$\langle \hat{n}(t) \rangle = \int_{-\infty}^{\infty} \left\{ \frac{e^{i\theta} + e^{-i\theta}}{2} \right\} \rho(\theta(t)) d\theta \hat{i}, \quad (14)$$

$$\langle \hat{n}(t) \rangle = e^{-D_R t} \cos \theta_0 \hat{i}. \quad (15)$$

We may then calculate the self-propelled velocity autocorrelation function as follows,

$$\begin{aligned} \langle \hat{n}(t_1) \cdot \hat{n}(t_2) \rangle &= \langle \cos \theta_1 \cos \theta_2 + \sin \theta_1 \sin \theta_2 \rangle, \\ &= \langle \cos(\theta_1 - \theta_2) \rangle. \end{aligned} \quad (16)$$

To calculate the Eq. (16) it is necessary to know the distribution of  $\bar{\theta}(\bar{t}) \equiv \theta_1 - \theta_2$ , but as previously, this is a Wiener process. From Eqs. (4) and (9) we have

$$\langle \bar{\theta}(\bar{t}) \rangle = 0, \quad (17)$$

$$\langle \bar{\theta}(\bar{t})^2 \rangle = 2D_R \bar{t}, \quad (18)$$

where  $\bar{t} \equiv |t_1 - t_2|$ , thus,

$$\rho(\bar{\theta}(\bar{t})) = \frac{1}{\sqrt{2\pi\sigma_{\bar{\theta}}^2}} \exp\left(-\frac{\bar{\theta}(\bar{t})^2}{2\sigma_{\bar{\theta}}^2}\right), \quad (19)$$

where  $\sigma_{\bar{\theta}}^2 = 2D_R\bar{t}$ . Using the same procedure of Eq. (14), but with  $\cos\bar{\theta}$  and  $\rho(\bar{\theta}(t))$ , we obtain

$$\langle \hat{n}(t_1) \cdot \hat{n}(t_2) \rangle = \int_{-\infty}^{\infty} \left\{ \frac{e^{i\bar{\theta}} + e^{-i\bar{\theta}}}{2} \right\} \rho(\bar{\theta}(t)) d\bar{\theta}, \quad (20)$$

$$\langle \hat{n}(t_1) \cdot \hat{n}(t_2) \rangle = e^{-D_R|t_1-t_2|}. \quad (21)$$

To write the  $msd(t)$  we use Eqs. (11) and (21),

$$\begin{aligned} v_0^2 \int_0^t \int_0^t e^{-D_R|t_1-t_2|} dt_1 dt_2 &= v_0^2 \int_0^t \int_0^{t_1} e^{D_R(t_2-t_1)} dt_2 dt_1 \\ &+ v_0^2 \int_0^t \int_0^{t_2} e^{D_R(t_1-t_2)} dt_1 dt_2, \\ &= \frac{v_0^2}{D_R} \int_0^t (1 - e^{-D_R t_1}) dt_1 \\ &+ \frac{v_0^2}{D_R} \int_0^t (1 - e^{-D_R t_2}) dt_2, \end{aligned}$$

$$msd(t) = 4D_T t + \frac{2v_0^2}{D_R} \left[ t + \frac{1}{D_R} (e^{-D_R t} - 1) \right], \quad (22)$$

$$msd(t) = 4D_T t + 2l_p^2 \left[ \frac{t}{\tau_R} + (e^{-t/\tau_R} - 1) \right], \quad (23)$$

where  $l_p = v_0\tau_R$  is the persistence length and  $\tau_R = 1/D_R$  is called persistence time. At short times,  $t \ll 4D_T/v_0^2$ , the motion is diffusive with the typical Brownian short-time thermal constant diffusion,  $msd(t) = 4D_T t$ . At intermediate times,  $4D_T/v_0^2 < t < 1/D_R$ , the motion is ballistic, and we find  $msd(t) = 4D_T t + v_0^2 t^2$ . At long times  $t \gg 1/D_R$ , the motion is diffusive com  $msd(t) = 4D_T t + 2v_0^2 t/D_R = 4Dt$ , where  $D = D_T + v_0^2/2D_R$  is the diffusion coefficient constant.

## 2 Mean Square Displacement for a System of Active Brownian Particles $\tau \rightarrow \infty$

For a system with  $N$  interacting active Brownian particles, the center of mass position dynamics  $\vec{R}_{CM}(t)$  follows equation

$$\dot{\vec{R}}_{CM}(t) = \frac{v_0}{N} \sum_i \hat{n}_i(t) + \frac{\mu}{N} \sum_i \sum_{i \sim j} \nabla U(\vec{r}_i(t)) + \frac{\sqrt{2D_R}}{N} \sum_i \vec{\chi}_i(t), \quad (24)$$

where the self orientation of each particle is given by

$$\dot{\theta}_i(t) = \sqrt{2D_R} \xi_i(t), \quad (25)$$

being  $\xi_i(t)$  and  $\vec{\chi}_i(t)$  Gaussian white noises with zero-mean with second moment  $\langle \xi_i(t_1) \xi_j(t_2) \rangle = \delta_{ij} \delta(t_1 - t_2)$  and  $\langle \vec{\chi}_i(t_1) \cdot \vec{\chi}_j(t_2) \rangle = 4D_T \delta_{ij} \delta(t_1 - t_2)$  independently for each particle at each time-step. Since all

forces derived from the potential are internal, Eq. (24) reduces to

$$\dot{\vec{R}}_{CM}(t) = \frac{v_0}{N} \sum_i^N \hat{n}_i(t) + \frac{\sqrt{2D_R}}{N} \sum_i^N \vec{\chi}_i(t), \quad (26)$$

Therefore, using the same procedure of the previous section, defining  $MSD(t) = \langle (\vec{R}_{CM}(t) - \vec{R}_{CM}(0))^2 \rangle$ , we find,

$$\begin{aligned} MSD(t) &= \frac{1}{N^2} \sum_i^N \sum_j^N \{ v_0^2 \int_0^t \int_0^t \langle \hat{n}_i(t_1) \cdot \hat{n}_j(t_2) \rangle dt_1 dt_2 \\ &\quad + 2D_T \int_0^t \int_0^t \langle \vec{\chi}_i(t_1) \cdot \vec{\chi}_j(t_2) \rangle dt_1 dt_2 \}, \end{aligned} \quad (27)$$

where

$$\langle \hat{n}_i(t) \rangle = e^{-D_R t} \cos \theta_0 \hat{i}, \quad (28)$$

$$\langle \hat{n}_i(t_1) \cdot \hat{n}_j(t_2) \rangle = \delta_{ij} e^{-D_R |t_1 - t_2|}. \quad (29)$$

Using Eq. (29) in Eq. (27), we get

$$\begin{aligned} MSD(t) &= \frac{1}{N} \{ v_0^2 \int_0^t \int_0^t e^{-D_R |t_1 - t_2|} dt_1 dt_2 \\ &\quad + 4D_T \int_0^t \int_0^t \delta(t_1 - t_2) dt_1 dt_2 \}, \end{aligned} \quad (30)$$

$$MSD(t) = \frac{msd(t)}{N}, \quad (31)$$

$$MSD(t) = \frac{4D_T}{N} t + \frac{2v_0^2}{D_R N} \left[ t + \frac{1}{D_R} (e^{-D_R t} - 1) \right], \quad (32)$$

$$MSD(t) = \frac{4D_T}{N} t + 2L_p^2 \left[ \frac{t}{\tau_R} + (e^{-D_R t} - 1) \right], \quad (33)$$

where  $L_p = v_0 \tau_R / \sqrt{N}$  is the persistence length. We can analyze the center of mass velocity fluctuations using Eq. (26),

$$\begin{aligned} \dot{\vec{R}}_{CM}(t) &= \frac{v_0}{N} \sum_i^N \hat{n}_i(t) + \frac{\sqrt{2D_R}}{N} \sum_i^N \vec{\chi}_i(t), \\ \vec{V}_{CM}(t) &= \frac{v_0}{N} \sum_i^N \hat{n}_i(t) + \frac{\sqrt{2D_R}}{N} \sum_i^N \vec{\chi}_i(t), \end{aligned} \quad (34)$$

$$\langle \vec{V}_{CM}(t) \rangle = \frac{v_0}{N} \sum_i^N \langle \hat{n}_i(t) \rangle = v_0 e^{-D_R t} \cos \theta_0 \hat{i},$$

$$\langle \vec{V}_{CM}(t) \rangle^2 = v_0^2 e^{-2D_R t} \cos^2 \theta_0 \xrightarrow{t \gg 1} 0. \quad (35)$$

The second moment of  $\vec{V}_{CM}(t)$  is

$$\left\langle \vec{V}_{CM}^2(t) \right\rangle = \frac{v_0^2}{N^2} \sum_i^N \sum_j^N \langle \hat{n}_i(t) \cdot \hat{n}_j(t) \rangle, \quad (36)$$

where we use  $\langle \hat{n}_i(t) \cdot \vec{\chi}_j(t) \rangle = \langle \hat{n}_i(t) \rangle \cdot \langle \vec{\chi}_j(t) \rangle$  and  $\langle \vec{\chi}_i(t) \cdot \vec{\chi}_j(t) \rangle = \langle \vec{\chi}_i(t) \rangle \cdot \langle \vec{\chi}_j(t) \rangle$ . Using the Eq. (29) in Eq. (36) we get

$$\left\langle \vec{V}_{CM}^2(t) \right\rangle = \frac{v_0^2}{N}. \quad (37)$$

Substituting Eq. (37) in Eq. (32), we obtain

$$MSD(t) = \frac{4D_T}{N}t + 2 \left\langle \vec{V}_{CM}^2(t) \tau_R \right\rangle [t + \tau_R(e^{-t/\tau_R} - 1)]. \quad (38)$$

### 3 Order parameter fluctuation

From Eq. (37) we obtain the stationary fluctuation of  $\vec{V}_{CM}^2$  for a system of ABP's,

$$\delta \vec{V}_{CM}^2 = \left\langle \vec{V}_{CM}^2 \right\rangle - \left\langle \vec{V}_{CM} \right\rangle^2 = \frac{v_0^2}{N}, \quad (39)$$

the definition of the translational order parameter is

$$\varphi(t) = \frac{1}{N} \left| \sum_i^N \frac{\vec{v}_i(t)}{|\vec{v}_i(t)|} \right|,$$

since forces in the ring are internal, we may approach  $|v_i| \sim |v_0 + \delta v_i|$  and rewrite Eq. (39) in first order approach as

$$\varphi(t) \sim \frac{1}{Nv_0} \left| \sum_i^N \vec{v}_i(t) \right|, \quad (40)$$

while for the CM velocity we have,

$$\vec{V}_{CM}^2(t) = \left| \vec{V}_{CM}(t) \right|^2 = \frac{1}{N^2} \left| \sum_i^N \vec{v}_i(t) \right|^2, \quad (41)$$

comparing Eqs. (39), (40) and (41), we conclude that

$$\delta \varphi(t)^2 = \left\langle \varphi(t)^2 \right\rangle - \left\langle \varphi(t) \right\rangle^2 \sim \frac{1}{N}, \quad (42)$$

$$\delta \varphi(t) = \sqrt{\left\langle \varphi(t)^2 \right\rangle - \left\langle \varphi(t) \right\rangle^2} \sim \frac{1}{\sqrt{N}}. \quad (43)$$

## 4 Ratio between radius of gyration of a rod and a circumference

The radius of gyration is defined as

$$R_{xx}(t) = \frac{1}{N} \sum_i^N (x_i(t) - X_{cm}(t))^2, \quad (44)$$

$$R_{yy}(t) = \frac{1}{N} \sum_i^N (y_i(t) - Y_{cm}(t))^2, \quad (45)$$

$$R_g(t)^2 = R_{xx}(t) + R_{yy}(t). \quad (46)$$

when the active ring is in circular format with radius  $R$ , its radius of gyration is

$$R_{g,cir}^2 = R^2 = \left( \frac{Nr_0}{2\pi} \right)^2, \quad (47)$$

$r_0$  being the distance between the particles composing the ring. In the limit the ring becomes a rod we can approach it by two parallel chains with  $N/2$  particles (Fig. 1) and we may calculate  $R_{xx}$  and  $R_{yy}$  as follows

$$\begin{aligned} R_{xx} &= \frac{4}{N} \sum_{k=1}^{\frac{N-1}{4}} (kr_0)^2, \\ R_{xx} &= \frac{r_0^2}{48N} (N-1)(N+1)(N+3), \\ R_{xx} &= \frac{r_0^2}{48} \left( N^2 + 3N - \frac{3}{N} - 1 \right). \end{aligned} \quad (48)$$

$$\begin{aligned} R_{yy} &= \frac{1}{N} \sum_{k=1}^N \left( \frac{r_0}{2} \right)^2, \\ R_{yy} &= \frac{r_0^2}{4}. \end{aligned} \quad (49)$$

Thus, we got  $R_{g,rod}^2$

$$\begin{aligned} R_{g,rod}^2 &= R_{xx} + R_{yy}, \\ R_{g,rod}^2 &= \frac{r_0^2}{48} \left( N^2 + 3N - \frac{3}{N} + 11 \right), \end{aligned} \quad (50)$$

Through of Eq. (47) and Eq. (50) we got the ratio

$$\frac{R_{g,rod}}{R_{g,cir}} = \sqrt{\frac{4\pi^2}{48} \left( 1 + \frac{3}{N} + \frac{11}{N^2} - \frac{3}{N^3} \right)}. \quad (51)$$

When  $N \gg 1$

$$\frac{R_{g,rod}}{R_{g,cir}} = \frac{\pi}{2\sqrt{3}} = 0.90689. \quad (52)$$

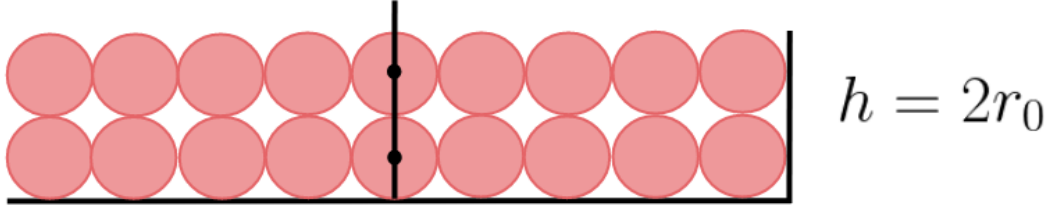

$$L = \frac{Nr_0}{2}$$

**Figure 1** Configuration of the system in the limit of rod.

Another way to calculate the ratio between the radius of gyration of a rod and a circumference it is to approach the two chains from Fig. 1 as a rectangle of width  $L$  and height  $h$ . The moment of inertia with respect to center of mass is

$$\begin{aligned} I_z &= \int_{-\frac{h}{2}}^{\frac{h}{2}} \int_{-\frac{L}{2}}^{\frac{L}{2}} (x^2 + y^2) \sigma dx dy, \\ I_z &= \frac{\sigma}{12} (h^3 L + L^3 h). \end{aligned} \quad (53)$$

The superficial density  $\sigma = \frac{M}{hL}$ ,  $h = 2r_0$  and  $L = Nr_0/2$ , we got

$$I_z = \frac{Mr_0^2}{48} (N^2 + 16). \quad (54)$$

The relationship between radius of gyrations and moment of inertia is

$$I_z = MR_g^2, \quad (55)$$

thus

$$R_{g,rod}^2 = \frac{r_0^2}{48} (N^2 + 16). \quad (56)$$

From Eq. (56) we have the ratio

$$\frac{R_{g,rod}}{R_{g,cir}} = \sqrt{\frac{4\pi^2}{48} \left(1 + \frac{16}{N^2}\right)}. \quad (57)$$

For  $N \gg 1$

$$\frac{R_{g,rod}}{R_{g,cir}} = \frac{\pi}{2\sqrt{3}} = 0.90689. \quad (58)$$

## 5 Movie Captions

- Movie 1: Active ring in RUN state. Time is in units of  $\tau_0$ . Frames are separated by  $0.3\tau_0$ . Set parameters:  $N = 20$ ,  $B = 0$ ,  $Fn = 1$ .  $\rightarrow$  Fig 3a
- Movie 2: Active ring in ROT state. Time is in units of  $\tau_0$ . Frames are separated by  $0.3\tau_0$ . Set parameters:  $N = 20$ ,  $B = 0$ ,  $Fn = 1$ .  $\rightarrow$  Fig 3b
- Movie 3: Active ring in PRW state. Time is in units of  $\tau_0$ . Frames are separated by  $0.3\tau_0$ . Set parameters:  $N = 20$ ,  $B = 0$ ,  $Fn = 1$ .  $\rightarrow$  Fig 3c
- Movie 4: Active ring in RRM state. Time is in units of  $\tau_0$ . Frames are separated by  $0.3\tau_0$ . Set parameters:  $N = 20$ ,  $B = 0$ ,  $Fn = 1$ .  $\rightarrow$  Fig 3d
- Movie 5: Active ring in RUN state. Time is in units of  $\tau_0$ . Frames are separated by  $0.3\tau_0$ . Set parameters:  $N = 100$ ,  $B = 0$ ,  $Fn = 100$ ,  $Pe = 5$ ,  $\tau = 0.1$ .  $\rightarrow$  Fig 12

## References

- [1] A. Martín-Gómez, D. Levis, A. Díaz-Guilera and I. Pagonabarraga, *Soft matter*, 2018, **14**, 2610–2618.
- [2] F. Schweitzer, *Brownian agents and active particles: collective dynamics in the natural and social sciences*, Springer Science & Business Media, 2003.
- [3] P. Romanczuk, M. Bär, W. Ebeling, B. Lindner and L. Schimansky-Geier, *The European Physical Journal Special Topics*, 2012, **202**, 1–162.
